# Supplementary material
Source: ML conference proceedings conference paper supplement (https://proceedings.neurips.cc/paper_files/paper/2017/hash/9f53d83ec0691550f7d2507d57f4f5a2-Abstract.html)
Supplement: Supplementary file [file 9f53d83ec0691550f7d2507d57f4f5a2-Supplemental.zip]

## A Proof of Proposition 2.1

Denote vector  $\mathbf{v}$  as  $(\sqrt{d_1}, \sqrt{d_2}, \dots, \sqrt{d_n})^T$ . To shift any vector  $\mathbf{x}$  so that  $\mathbf{v}^T \mathbf{x} = 0$ , we only need to multiply  $(I - \frac{\mathbf{v}\mathbf{v}^T}{\mathbf{v}^T \mathbf{1}})$  on the left. For any  $k$ , we have

$$\mathbf{x}^{(k)} = L^\dagger B \mathbf{t}^{(k)}, \quad \mathbf{x}_{\text{shift}}^{(k)} = (I - \frac{\mathbf{v}\mathbf{v}^T}{\mathbf{v}^T \mathbf{1}}) \mathbf{x}^{(k)} \quad (8)$$

Based on the algorithm (see (4)), we also know

$$\bar{\mathbf{x}}^{k,l+1} = (1 - \epsilon) D^{-1} (A \mathbf{x}^{k,l} + B \mathbf{t}^{(k)}) + \epsilon \mathbf{x}^{k,l} \quad (9)$$

$$= (1 - \epsilon) D^{-1} (D - L) \mathbf{x}^{k,l} + (1 - \epsilon) D^{-1} B \mathbf{t}^{(k)} + \epsilon \mathbf{x}^{k,l} \quad (A = D - L) \quad (10)$$

$$= (1 - \epsilon) (I - D^{-1} L) \mathbf{x}^{k,l} + (1 - \epsilon) D^{-1} L \mathbf{x}^{(k)} + \epsilon \mathbf{x}^{k,l} \quad (\text{from (8)}) \quad (11)$$

$$= \mathbf{x}^{k,l} - (1 - \epsilon) D^{-1} L \mathbf{x}^{k,l} + (1 - \epsilon) D^{-1} L \mathbf{x}^{(k)} \quad (12)$$

$$= \mathbf{x}^{k,l} - (1 - \epsilon) D^{-1} L \mathbf{x}^{k,l} + (1 - \epsilon) D^{-1} L \mathbf{x}_{\text{shift}}^{(k)} \quad (\text{since } L \mathbf{1} = \mathbf{0}) \quad (13)$$

$$= \mathbf{x}^{k,l} - (1 - \epsilon) D^{-1} L (\mathbf{x}^{k,l} - \mathbf{x}_{\text{shift}}^{(k)}) \quad (14)$$

This immediately implies

$$\mathbf{x}^{k,l+1} - \mathbf{x}_{\text{shift}}^{(k)} = (I - \frac{\mathbf{v}\mathbf{v}^T}{\mathbf{v}^T \mathbf{1}}) (\mathbf{x}^{k,l} - \mathbf{x}^{(k)}) \quad (15)$$

$$= (I - \frac{\mathbf{v}\mathbf{v}^T}{\mathbf{v}^T \mathbf{1}}) (\mathbf{x}^{k,l} - \mathbf{x}_{\text{shift}}^{(k)}) \quad (16)$$

$$= (I - \frac{\mathbf{v}\mathbf{v}^T}{\mathbf{v}^T \mathbf{1}}) (I - (1 - \epsilon) D^{-1} L) (\mathbf{x}^{k,l} - \mathbf{x}_{\text{shift}}^{(k)}) \quad (17)$$

or more related to the proposition, we have

$$D^{\frac{1}{2}} (\mathbf{x}^{k,l+1} - \mathbf{x}_{\text{shift}}^{(k)}) = [D^{\frac{1}{2}} (I - \frac{\mathbf{v}\mathbf{v}^T}{\mathbf{v}^T \mathbf{1}}) (I - (1 - \epsilon) D^{-1} L) D^{-\frac{1}{2}}] D^{\frac{1}{2}} (\mathbf{x}^{k,l} - \mathbf{x}_{\text{shift}}^{(k)}) \quad (18)$$

where the middle part can be simplified as

$$D^{\frac{1}{2}} (I - \frac{\mathbf{v}\mathbf{v}^T}{\mathbf{v}^T \mathbf{1}}) (I - (1 - \epsilon) D^{-1} L) D^{-\frac{1}{2}} = (D^{\frac{1}{2}} - \frac{\mathbf{v}\mathbf{v}^T}{\mathbf{v}^T \mathbf{1}}) (I - (1 - \epsilon) D^{-1} L) D^{-\frac{1}{2}} \quad (19)$$

$$= (D^{\frac{1}{2}} - \frac{\mathbf{v}\mathbf{v}^T}{\mathbf{v}^T \mathbf{1}}) D^{-\frac{1}{2}} (I - (1 - \epsilon) D^{-\frac{1}{2}} L D^{-\frac{1}{2}}) \quad (20)$$

$$= (I - \frac{\mathbf{v}\mathbf{1}^T}{\mathbf{v}^T \mathbf{1}}) (I - (1 - \epsilon) D^{-\frac{1}{2}} L D^{-\frac{1}{2}}) \quad (21)$$

The first equality comes from  $D^{\frac{1}{2}} \mathbf{1} = \mathbf{v}$  and the last equality comes from  $\mathbf{v}^T D^{-\frac{1}{2}} = \mathbf{1}^T$ .

(21) is crucial to our analysis, the first matrix  $I - \frac{\mathbf{v}\mathbf{1}^T}{\mathbf{v}^T \mathbf{1}}$  has eigenvalues 1 with multiplicity  $n - 1$  and 0 with multiplicity 1, the eigenvector corresponding to eigenvalue 0 is  $\mathbf{v}$ .

The eigenvalues of  $D^{-\frac{1}{2}} L D^{-\frac{1}{2}}$  is in range  $[0, 2]$ . By assuming spectral gap  $\rho < 1$ , we have  $2 - \rho \geq \lambda_1 \geq \lambda_2 \geq \dots \geq \lambda_{n-1} \geq \rho > \lambda_n = 0$ .

Therefore,  $I - (1 - \epsilon) D^{-\frac{1}{2}} L D^{-\frac{1}{2}}$  has eigenvalues in  $\{1, [-1 + 2\epsilon + (1 - \epsilon)\rho, 1 - (1 - \epsilon)\rho]\}$ , where the corresponding eigenvector for eigenvalue 1 is  $\mathbf{v}$ . However, notice that  $(I - \frac{\mathbf{v}\mathbf{1}^T}{\mathbf{v}^T \mathbf{1}}) \mathbf{v} = \mathbf{0}$ , i.e. this eigenvector will be filtered out by the first matrix.

Therefore, we have

$$\|(I - (1 - \epsilon) \frac{\mathbf{v}\mathbf{1}^T}{\mathbf{v}^T \mathbf{1}}) (I - D^{-\frac{1}{2}} L D^{-\frac{1}{2}})\| \leq \max\{1 - (1 - \epsilon)\rho, 1 - 2\epsilon - (1 - \epsilon)\rho\} = 1 - (1 - \epsilon)\rho$$

which completes the proof of the proposition.  $\square$

## B Proof of Theorem 3.1

**Proposition B.1** *Given two graph Laplacian matrices  $L_1, L_2 \in \mathbb{R}^{n \times n}$ . Suppose  $\lambda_n(L_2) < \lambda_2(L_1)$ , then*

$$(L_1 - L_2)^\dagger = L_1^\dagger + \sum_{n=1}^{\infty} (L_1^\dagger L_2)^n L_1^\dagger.$$

*Proof:* By using the identities  $L^\dagger L = I - J$ ,  $JL = 0$  in which  $L$  is a Laplacian matrix and  $J = \frac{1}{n}e \cdot e^T$ , we have

$$L_1(I - L_1^\dagger L_2) = L_1 - (I - J)L_2 = L_1 - L_2.$$

Plugging it into  $(L_1 - L_2)^\dagger$ , we obtain

$$(L_1 - L_2)^\dagger = (L_1(I - L_1^\dagger L_2))^\dagger = (I - L_1^\dagger L_2)^\dagger L_1^\dagger.$$

With orthogonal decomposition, we can express  $L_1, L_2$  as

$$L_1 = \sum_{i=2}^n \lambda_i(L_1) u_i u_i^T, L_2 = \sum_{i=2}^n \lambda_i(L_2) v_i v_i^T,$$

in which  $\{u_i\}, \{v_i\}$  are the corresponding eigenvectors of  $L_1, L_2$  respectively. In this way,

$$L_1^\dagger = \sum_{i=2}^n \frac{1}{\lambda_i} u_i u_i^T.$$

By definition of quadratic matrix norm, for any vector  $x \in \mathbb{R}^n$ ,  $\|x\|_2 = 1$ , we have

$$\left\| \sum_{i=2}^n \lambda_i(L_2) v_i v_i^T x \right\|_2 \leq \lambda_n(L_2),$$

and

$$\left\| \sum_{i=2}^n \lambda_i(L_2) v_i v_i^T \sum_{i=2}^n \lambda_i(L_1) u_i u_i^T x \right\|_2 \leq \frac{\lambda_n(L_2)}{\lambda_2(L_1)} < 1,$$

which means  $\|L_1^\dagger L_2\|_2 < 1$ .

Since  $\|L_1^\dagger L_2\|_2 < 1$ , the matrix series  $M = I + \sum_{n=1}^{\infty} (L_1^\dagger L_2)^n$  converges and  $(I - L_1^\dagger L_2)M = I$ . Thus  $I - L_1^\dagger L_2$  is invertible and its inversion is  $I + \sum_{n=1}^{\infty} (L_1^\dagger L_2)^n$ . Hence we obtain

$$(L_1 - L_2)^\dagger = L_1^\dagger + \sum_{n=1}^{\infty} (L_1^\dagger L_2)^n L_1^\dagger.$$

□

**Proposition B.2** *Given two  $n$  by  $n$  Laplacian matrices  $L_G, L_{G'}$  corresponding to graph  $G, G'$ , which satisfies  $G' \subseteq G$ .  $L_{G'}$  equals to  $B_{G'} B_{G'}^T$ , where  $B_{G'}$  is the edge matrix of  $G'$ . The maximum degree among all vertices of  $G'$  is less or equal to  $d$ , then we have the following inequality:*

$$\|L_G^\dagger B_{G'}\|_\infty \leq d \left( \max_k |L_{G, kk}^\dagger| + \max_{i \neq j} |L_{G, ij}^\dagger| + \frac{n}{2} \max_{\substack{i, j, k \\ \text{pairwisely different}}} |L_{G, ki}^\dagger - L_{G, kj}^\dagger| \right)$$

*In particular, if  $G$  is a clique, the above inequality can be reduced to*

$$\|L_G^\dagger B_{G'}\|_\infty \leq \frac{d}{n}.$$

$$\begin{aligned}
\|L_G^\dagger B_{G'}\|_\infty &= \max_k \{ \|e_k^T L_G^\dagger B_{G'}\|_1 \} \\
&= \max_k \left\{ \sum_{(i,j) \in G'} |L_{G,ki}^\dagger - L_{G,kj}^\dagger| \right\} \\
&\leq \max_k \sum_{j \in \mathcal{N}(G',k)} |L_{G,kk}^\dagger - L_{G,kj}^\dagger| + \max_k \sum_{\substack{i,j \neq k \\ (i,j) \in G'}} |L_{G,ki}^\dagger - L_{G,kj}^\dagger| \\
&\leq d \max_k |L_{G,kk}^\dagger| + \max_k \sum_{j \in \mathcal{N}(G',k)} |L_{G,kj}^\dagger| + \max_k \sum_{\substack{i,j \neq k \\ (i,j) \in G'}} |L_{G,ki}^\dagger - L_{G,kj}^\dagger| \\
&\leq d \max_k |L_{G,kk}^\dagger| + d \max_{i \neq j} |L_{G,ij}^\dagger| + \frac{nd}{2} \max_{\substack{i,j,k \\ \text{pairwisely different}}} |L_{G,ki}^\dagger - L_{G,kj}^\dagger|
\end{aligned}$$

The last line comes from the fact that the size of neighborhoods  $\mathcal{N}(G', k)$  is upper bounded by  $d$  so the number of edges in  $G'$  should be bounded by  $\frac{nd}{2}$  as well.  $\square$

**Proposition B.3** *Given two  $n$  by  $n$  Laplacian matrices  $L_G, L_{G'}$  corresponding to graph  $G, G'$ , which satisfies  $G' \subseteq G$ . The maximal degree among all vertices of  $G'$  is equal or less than  $d$ , then we claim*

$$\|L_G^\dagger L_{G'}\|_\infty \leq d \left( 2 \max_k |L_{G,kk}^\dagger| + 2 \max_{i \neq j} |L_{G,ij}^\dagger| + n \max_{\substack{i,j,k \\ \text{pairwisely different}}} |L_{G,ki}^\dagger - L_{G,kj}^\dagger| \right)$$

In particular, if  $G$  is a clique, the above inequality can be reduced to

$$\|L_G^\dagger L_{G'}\|_\infty \leq \frac{2d}{n}.$$

*Proof:*

$$\begin{aligned}
\|L_G^\dagger L_{G'}\|_\infty &= \max_k \left\{ \sum_j \left| \sum_i L_{G,ki}^\dagger L_{G',ij} \right| \right\} \\
&= \max_k \left\{ \sum_j |L_{G,kj}^\dagger \deg(G', j) - \sum_{i \in \mathcal{N}(G',j)} L_{G,ki}^\dagger| \right\} \\
&= \max_k \left\{ \sum_j \left| \sum_{i \in \mathcal{N}(G',j)} (L_{G,kj}^\dagger - L_{G,ki}^\dagger) \right| \right\} \\
&\leq 2 \max_k \sum_{(i,j) \in G'} |L_{G,kj}^\dagger - L_{G,ki}^\dagger| \\
&= 2 \sum_{j \in \mathcal{N}(G',k)} |L_{G,kk}^\dagger - L_{G,kj}^\dagger| + 2 \sum_{\substack{(i,j) \in G' \\ i,j \neq k}} |L_{G,ki}^\dagger - L_{G,kj}^\dagger| \\
&\leq 2d \max_k |L_{G,kk}^\dagger| + 2d \max_{i \neq j} |L_{G,ij}^\dagger| + n \max_{\substack{i,j,k \\ \text{pairwisely different}}} |L_{G,ki}^\dagger - L_{G,kj}^\dagger|
\end{aligned}$$

$\square$

*Proof of Theorem 3.1:* At first we show that assuming  $\mathbf{x}^{gt} = 0$  will not damage the generality of the proof. To this end, do transformation from original measurements  $\mathbf{t}$  to  $\mathbf{t}'$  as  $t'_{ij} = t_{ij} - x_i^{gt} + x_j^{gt}$ . The condition for correct measurement  $t_{ij}$  turns to  $|t'_{ij}| \leq \sigma$ . If  $\mathbf{t}'$  with ground truth  $\mathbf{0}$ , the same truncation strategy as  $\mathbf{t}$  with  $\mathbf{x}^{gt}$  produces iterative solution  $\mathbf{x}'^{(k)}$ , and initializaion  $\mathbf{x}'^{(0)} = \mathbf{x}^{(0)} - \mathbf{x}^{gt}$ , then we assert that

$$\mathbf{x}^{(k)} = \mathbf{x}'^{(k)} + \mathbf{x}^{gt}$$

holds for all  $k \in \mathbb{N}$ .

By induction we assume  $\mathbf{x}^{(k)} = \mathbf{x}'^{(k)} + \mathbf{x}^{gt}$ , thus the truncated graph  $G_k$  of  $\mathbf{x}'^{(k)}$  must be the same as  $\mathbf{x}^{(k)}$  since they use the same truncation strategy. Our algorithm provides the next  $\mathbf{x}$  and  $\mathbf{x}'$  as

$$\mathbf{x}^{(k+1)} = L_{G_k}^\dagger B_{G_k} \mathbf{t}_{G_k}$$

$$\mathbf{x}'^{(k+1)} = L_{G_k}^\dagger B_{G_k} \mathbf{t}'_{G_k}.$$

Since our truncation strategy make sure the correct measurements will not be truncated,  $G_k$  is certainly a connected graph. Thus  $\mathbf{x}^{gt}$  is the unique precise solution of the linear function  $B_{G_k} \mathbf{x} = \mathbf{t}_{G_k}^0$  in which  $\mathbf{t}_{G_k}^0$  is the measurements without error on graph  $G_k$ . Thus by the process of the derivation of  $L_{G_k}^\dagger B_{G_k}$  we know that

$$L_{G_k}^\dagger B_{G_k} \mathbf{t}_{G_k}^0 = \mathbf{x}^{gt}.$$

Note  $\mathbf{t}_{G_k} = \mathbf{t}'_{G_k} + \mathbf{t}_{G_k}^0$ , hence we get the identity

$$\mathbf{x}^{(k+1)} = \mathbf{x}'^{(k+1)} + \mathbf{x}^{gt}.$$

We have seen  $\mathbf{x}^{(k)}$  with  $\mathbf{x}^{gt}$  behaves completely the same as  $\mathbf{x}'^{(k)}$  with  $\mathbf{0}$ , therefore they must have the same concentration bound, so we assume  $\mathbf{x}^{gt} = \mathbf{0}$  below.

Returning to the original proposition. Prove this theorem by induction. Assume

$$\|\mathbf{x}^{(k)}\|_\infty \leq q\sigma + 2p\epsilon c^{k-1}$$

and

$$k \leq -\log \left( \frac{\epsilon(c-4p)}{(1+2q)\sigma} \right) / \log c + 1$$

, or

$$(1+2q)\sigma \leq \epsilon(c-4p)c^{k-1}.$$

At  $k$ -th iteration, the truncation threshold should be  $c^k \epsilon$ . Since for any correct measurement  $t_{ij}$  we have

$$|t_{ij} - x_i^{(k)} + x_j^{(k)}| \leq \sigma + 2\|\mathbf{x}^{(k)}\|_\infty \leq (1+2q)\sigma + 4p\epsilon c^{k-1} \leq \epsilon c^k,$$

no correct measurement can be truncated. On the other hand, all survived measurement should satisfy

$$|t_{ij}| \leq |t_{ij} - x_i^{(k)} + x_j^{(k)}| + 2\|\mathbf{x}^{(k)}\|_\infty \leq \epsilon c^k + 2q\sigma + 4p\epsilon c^{k-1}$$

Let  $G_T$  be the graph consisting of all edges that are dropped at  $k$ -th iteration. According to the previous argument, we can write  $x^k$  as

$$\mathbf{x}^{(k+1)} = (L_G - L_{\overline{G}})^\dagger B_{G \setminus \overline{G}} \mathbf{t}^{(k)}$$

in which  $L_G, L_{\overline{G}}$  are the Laplacian matrices of  $G$  and  $G_T$  respectively while  $B_{G \setminus \overline{G}}$  is the edge adjacent matrix of  $G \setminus \overline{G}$ . It is clear that  $G_T \subseteq G \setminus \overline{G}$ .

Using Proposition B.1, we have

$$(L_G - L_{\overline{G}})^\dagger = \sum_{k=0}^{\infty} (L_G^\dagger L_{\overline{G}})^k L_G^\dagger.$$

Using Proposition A.2, A.3, we obtain upper bounds

$$\|L_G^\dagger B_{G \setminus G_{good}}\|_\infty \leq d_{bad} \alpha = h,$$

$$\|L_G^\dagger L_{\overline{G}}\|_\infty \leq 2d_{bad} \alpha = 2h,$$

and

$$\|L_G^\dagger B_{G_{good}}\|_\infty \leq n\alpha,$$

so that

$$\begin{aligned}
\|\mathbf{x}^{(k+1)}\|_\infty &= \left\| \sum_{k=0}^{\infty} (L_G^\dagger L_{\bar{G}})^n (L_G^\dagger B_{G \setminus \bar{G}} \mathbf{t}^{(k)}) \right\|_\infty \\
&\leq \frac{1}{1-2h} \left\| L_G^\dagger B_{G_{good}} \mathbf{t}_{G_{good}} + L_G^\dagger B_{G \setminus \bar{G} \setminus G_{good}} \mathbf{t}_{G \setminus \bar{G} \setminus G_{good}} \right\|_\infty \\
&\leq \frac{1}{1-2h} \left( n\alpha \|\mathbf{t}_{G_{good}}\|_\infty + d_{bad}\alpha \|\mathbf{t}_{G \setminus \bar{G} \setminus G_{good}}\|_\infty \right) \\
&\leq \frac{1}{1-2h} (n\alpha\sigma + h(\epsilon c^k + 2q\sigma + 4p\epsilon c^{k-1})) \\
&= q\sigma + p\sigma + p(\epsilon c^k + 2q\sigma + 4p\epsilon c^{k-1}) \\
&\leq q\sigma + 2p\epsilon c^k
\end{aligned}$$

in which the last line used the inductive condition  $(1+2q)\sigma \leq \epsilon(c-4p)c^{k-1}$ . The correctness of proposition follows immediately by induction.

Continue the iterative process until  $\epsilon(c-4p)c^k < (1+2q)\sigma$  (this means  $(1+2q)\sigma \leq \epsilon(c-4p)c^{k-1}$ , so our inductive argument works for  $x^{(k)}$ ), at which time we obtain the bound on  $x^{(k)}$

$$\|\mathbf{x}^{(k+1)}\|_\infty \leq q\sigma + 2p\epsilon c^k \leq \frac{2p+cq}{c-4p}\sigma$$

□

## C Analysis of the randomized case

### C.1 Proof of Lemma 3.1

The key idea is to leverage the independence of  $\{t_{ij}\}$  from  $\mathbf{x}^{(0)}$  and redefine the noise model so that the selection of the edges is separated from the measurements. To simplify the notations, we denote

$$\bar{r} = \frac{2\delta}{a+b}, \quad r = \frac{p}{p+(1-p)\bar{r}}.$$

**Lemma C.1** Associate each edge  $(i, j) \in \mathcal{E}$  with a random variable  $w_{ij}$  given by

$$w_{ij} = \begin{cases} 1 & \text{with probability } p + \bar{r}(1-p), \\ 0 & \text{with probability } (1-\bar{r})(1-p) \end{cases} \quad (22)$$

Redefine the independent measurement  $\hat{t}_{ij}$  along each edge as

$$\hat{t}_{ij} = \bar{t}_{ij} + (1-r)(x_i^{(0)} - x_j^{(0)}), \quad \bar{t}_{ij} := \begin{cases} -(1-r)(x_i^0 - x_j^0) + \sigma U[-1, 1] & \text{with probability } r \\ r(x_i^0 - x_j^0) + \bar{r}\zeta_{ij} & \text{with probability } 1-r \end{cases}$$

Then this noise model and the original model are identical.

*Proof:* It is clear that the probability that an edge is selected is  $p + \frac{2\delta}{a+b}(1-p) = p + (1-p)\bar{r}$ . Moreover,

$$w_{ij}\bar{t}_{ij} = \begin{cases} 0 & \text{with probability } p \\ (x_i^{(0)} - x_j^{(0)}) + \bar{r}\zeta_{ij} & \text{with probability } \frac{2\delta}{a+b}(1-p) \\ 0 & \text{with probability } \frac{a+b-2\delta}{a+b}(1-p) \end{cases}$$

□

The following proposition provides a decomposition of  $\mathbf{x}^{(1)}$  under the new noise model.

**Lemma C.2** Let  $L_w$  and  $B_w$  denote the truncated Laplacian matrix and vertex-edge adjacency matrix, respectively. Let  $\bar{\mathbf{t}}$  collect  $\bar{t}_{ij}, (i, j) \in \mathcal{G}$ . Then

$$\mathbf{x}^{(1)} = (1-r)\mathbf{x}^{(0)} + L_w^+ B_w \bar{\mathbf{t}}. \quad (23)$$

*Proof:* Let  $\hat{\mathbf{t}}$  collect  $\hat{t}_{ij}, (i, j) \in \mathcal{G}$ , then

$$\begin{aligned}\mathbf{x}^{(1)} &= L_{\mathbf{w}}^+ B_{\mathbf{w}} \hat{\mathbf{t}} = L_{\mathbf{w}}^+ B_{\mathbf{w}} ((1-r)B^T \mathbf{x}^{(0)} + \bar{\mathbf{t}}) \\ &= (1-r)(I_n - \frac{1}{n} \mathbf{1}\mathbf{1}^T) \mathbf{x}^{(0)} + L_{\mathbf{w}}^+ B_{\mathbf{w}} \bar{\mathbf{t}} \\ &= (1-r)x^{(0)} + L_{\mathbf{w}}^+ B_{\mathbf{w}} \bar{\mathbf{t}}.\end{aligned}$$

□

Since  $L_{\mathbf{w}}^+ B_{\mathbf{w}}$  and  $\bar{\mathbf{t}}$  are independent, (23) allows us to apply concentration bounds on  $\bar{t}_{ij}$ . To this end, we first establish the following inequality:

**Lemma C.3** Denote  $\|\mathbf{x}^{(0)}\|_{d,\infty} = \max_{1 \leq i,j \leq n} |x_i^{(0)} - x_j^{(0)}|$  and let  $\bar{r}_2 = \max(\|\mathbf{x}^{(0)}\|_{d,\infty}, \bar{r})$ . For fixed  $\mathbf{w}$ , we have

$$\text{Var}(\mathbf{e}_i^T L_{\mathbf{w}}^+ B_{\mathbf{w}} \bar{\mathbf{t}}) \leq ((1-r)(\frac{1}{3} + r) \cdot \bar{r}_2^2 + \frac{r\sigma^2}{3}) L_{\mathbf{w},ii}^+ \quad (24)$$

*Proof:* First of all, we have

$$\begin{aligned}\text{Var}(\bar{t}_{ij}) &= (1-r)(\frac{\bar{r}^2}{3} + r(x_i^{(0)} - x_j^{(0)})^2) + \frac{r\sigma^2}{3} \\ &\leq (1-r)(\frac{\bar{r}^2}{3} + r\|\mathbf{x}^{(0)}\|_{d,\infty}^2) + \frac{r\sigma^2}{3}\end{aligned}$$

It follows that

$$\begin{aligned}\text{Var}(\mathbf{e}_i^T L_{\mathbf{w}}^+ B_{\mathbf{w}} \bar{\mathbf{t}}) &= \sum_{(j,k) \in \mathcal{G}} \text{Var}(w_{ij}(L_{\mathbf{w},ij}^+ - L_{\mathbf{w},ik}^+) \bar{t}_{ij}) \\ &\leq \sum_{(j,k) \in \mathcal{G}} w_{ij}(L_{\mathbf{w},ij}^+ - L_{\mathbf{w},ik}^+)^2 (1-r)(\frac{\bar{r}^2}{3} + r\|\mathbf{x}^{(0)}\|_{d,\infty}^2) \\ &= \mathbf{e}_i^T L_{\mathbf{w}}^+ \cdot L_{\mathbf{w}} \cdot L_{\mathbf{w}}^+ \mathbf{e}_i (1-r)(\frac{\bar{r}^2}{3} + r\|\mathbf{x}^{(0)}\|_{d,\infty}^2) \\ &= \mathbf{e}_i^T L_{\mathbf{w}}^+ \mathbf{e}_i (1-r)(\frac{\bar{r}^2}{3} + r\|\mathbf{x}^{(0)}\|_{d,\infty}^2) \\ &= (1-r)(\frac{\bar{r}^2}{3} + r\|\mathbf{x}^{(0)}\|_{d,\infty}^2) \cdot L_{\mathbf{w},ii}^+ \\ &\leq ((1-r)(\frac{1}{3} + r) \cdot \bar{r}_2^2 + \frac{r\sigma^2}{3}) L_{\mathbf{w},ii}^+.\end{aligned}$$

□

Moreover, the range of each summand in  $\mathbf{e}_i^T L_{\mathbf{w}}^+ B_{\mathbf{w}} \bar{\mathbf{t}}$  is bounded above by

$$\begin{aligned}\max_{1 \leq j,k} |L_{\mathbf{w},ij}^+ - L_{\mathbf{w},ik}^+| |\max(\bar{t}_{ij}) - \min(\bar{t}_{ij})| &\leq 2L_{\mathbf{w},ii}^+ |\max(\bar{t}_{ij}) - \min(\bar{t}_{ij})| \\ &\leq 4L_{\mathbf{w},ii}^+ \bar{r}_2.\end{aligned}$$

The following proposition directly follows from the Bernstein inequality:

**Fact C.1** Let  $\|\text{Diag}(L_{\mathbf{w}}^+)\|_{\infty} = \max_{1 \leq i \leq n} L_{\mathbf{w},ii}^+$ . For fixed  $\mathbf{w}$ , we have for

$$\Pr(\|\mathbf{x}^{(1)} - (1-r)\mathbf{x}^{(0)}\| \geq \bar{r}_2 \sqrt{\text{Diag}(L_{\mathbf{w}}^+) t}) \leq 2n \exp\left(-\frac{t^2}{2((1-r)(\frac{1}{3} + r) + \frac{4}{3} \sqrt{\text{Diag}(L_{\mathbf{w}}^+) \cdot t})}\right). \quad (25)$$

It remains to bound the diagonal entries of  $L_{\mathbf{w}}^+$ , which is given below:

**Lemma C.4** Let  $d_{\min} = \Omega(\log^2(n))$  be the minimal degree of  $\mathcal{G}$ . Suppose  $p + \bar{r}(1 - p) = \Omega(\log^2(n)/d_{\min})$ . Then w.h.p.,

$$\|\text{Diag}(L_{\mathbf{w}}^+)\|_{\infty} \leq \frac{1 + o(1)}{(p + \bar{r}(1 - p))d_{\min}\lambda_2(\bar{L}_{\mathcal{G}})}, \quad (26)$$

where  $\bar{L}_{\mathcal{G}}$  is the normalized graph Laplacian of  $\mathcal{G}$ .

*Proof:* We first show that for the Laplacian matrix  $L$  of any graph  $G$ ,

$$L_{ii}^+ \leq \frac{1}{d_i\lambda_2(\bar{L})},$$

where  $\bar{L}$  is the normalized graph Laplacian of  $G$ . In fact,

$$L_{ii}^+ = \frac{1}{d_i}\bar{L}_{ii}^+ \leq \frac{1}{d_i}\lambda_n(\bar{L}^+) = \frac{1}{d_i}\lambda_2(\bar{L}).$$

The rest of the proof follows from the concentration of vertex degrees of random subgraphs and Theorem 1 in [6].  $\square$

Now we can complete the proof of Lemma C.1 by setting  $t = O(\sqrt{\log(n)})$  in (25).

## C.2 Proof of Theorem 3.2

As shown in the previous Section, we assume  $\mathbf{x}^{gt} = 0$  with losing generality. Lemma 3.1 tells us that for fixed  $\mathbf{x}^{(0)}$ , one step of TranSync results in a solution that is closer to the ground-truth solution. We can apply it to a dense samples along the segment between  $\mathbf{x}^{gt}$  and  $\mathbf{x}^{gt} + \frac{a+b}{2}\mathbf{1}$ , e.g.,  $n\sqrt{n}(a+b)/2$  samples so that the distance between adjacent samples along each axis is at most  $\frac{1}{n}$ . It is clear that Lemma 3.1 still holds among these sample points.

To prove the convergence of  $\mathbf{x}^{(k)}$ , we seek to bound

$$\|\mathbf{x}^{(k+1)} - \frac{p}{p + (1-p)c^k}\mathbf{x}^{(k)}\|_{\infty} \leq \|\bar{\mathbf{x}}^{(k+1)} - \frac{p}{p + (1-p)c^k}\bar{\mathbf{x}}^{(k)}\|_{\infty} \quad (27)$$

$$+ \|\mathbf{x}^{(k+1)} - \bar{\mathbf{x}}^{(k+1)}\|_{\infty} + \frac{p}{p + (1-p)c^k}\|\mathbf{x}^{(k)} - \bar{\mathbf{x}}^{(k)}\|_{\infty}, \quad (28)$$

where  $\bar{\mathbf{x}}^{(k)}$  is chosen to be the closest point of  $\mathbf{x}^{(k)}$  to the segment under the  $L^{\infty}$  norm, and  $\bar{\mathbf{x}}^{(k+1)}$  is the result of one step of TranSync. We can apply Lemma 3.1 to obtain a bound on  $\|\bar{\mathbf{x}}^{(k+1)} - \frac{p}{p + (1-p)c^k}\bar{\mathbf{x}}^{(k)}\|_{\infty}$ . It remains to bound  $\|\mathbf{x}^{(k+1)} - \bar{\mathbf{x}}^{(k+1)}\|_{\infty}$ . To this end, we start with the following Lemma.

**Lemma C.5** Given a fixed input  $\mathbf{t}$ , starting from two different points  $\mathbf{x}^{(k)}$  and  $\bar{\mathbf{x}}^{(k)}$ . Let  $\mathbf{x}^{(k+1)}$  and  $\bar{\mathbf{x}}^{(k+1)}$  be the results of applying one step of TranSync. Then

$$\|\mathbf{x}^{(k+1)} - \bar{\mathbf{x}}^{(k+1)}\|_{\infty} \leq \frac{2d_{\max}^{dif}\|L_{\mathbf{t},\bar{\mathbf{x}}^{(k)}}^+\|_{1,\infty}(\|\bar{\mathbf{x}}^{(k+1)}\|_{\infty} + \|\mathbf{x}^{(k)} - \bar{\mathbf{x}}^{(k)}\|_{\infty} + \frac{1}{2}c^k)}{1 - 2d_{\max}^{dif}\|L_{\mathbf{t},\bar{\mathbf{x}}^{(k)}}^+\|_{1,\infty}}, \quad (29)$$

where  $L_{\text{dif}} = L_{\mathbf{t},\bar{\mathbf{x}}^{(k)}} - L_{\mathbf{t},\mathbf{x}^{(k)}}$ , and  $L_{\mathbf{t},\mathbf{x}^{(k)}}$  and  $L_{\mathbf{t},\bar{\mathbf{x}}^{(k)}}$  are truncated Laplacians derived from  $\mathbf{x}^{(k)}$  and  $\bar{\mathbf{x}}^{(k)}$ , respectively.  $d_{\max}^{dif}$  is the maximum number of different edges between these two graphs per vertex.

*Proof:* Let  $B_{\mathbf{t}, \mathbf{x}^{(k)}}$  and  $B_{\mathbf{t}, \bar{\mathbf{x}}^{(k)}}$  be the corresponding vertex-edge adjacency matrix. Define  $B_{\text{dif}} = B_{\mathbf{t}, \bar{\mathbf{x}}^{(k)}} - B_{\mathbf{t}, \mathbf{x}^{(k)}}$ . First, we have

$$\begin{aligned}
\|\bar{\mathbf{x}}^{(k+1)} - \mathbf{x}^{(k+1)}\|_\infty &= \|(L_{\mathbf{t}, \bar{\mathbf{x}}^{(k)}} + L_{\text{dif}})^+ (B_{\mathbf{t}, \bar{\mathbf{x}}^{(k)}} + B_{\text{dif}}) \mathbf{t} - L_{\mathbf{t}, \bar{\mathbf{x}}^{(k)}}^+ B_{\mathbf{t}, \bar{\mathbf{x}}^{(k)}} \mathbf{t}\|_\infty \\
&\leq \left\| \left( (L_{\mathbf{t}, \bar{\mathbf{x}}^{(k)}} + L_{\text{dif}})^+ - L_{\mathbf{t}, \bar{\mathbf{x}}^{(k)}}^+ \right) B_{\mathbf{t}, \bar{\mathbf{x}}^{(k)}} \mathbf{t} \right\|_\infty + \|(L_{\mathbf{t}, \bar{\mathbf{x}}^{(k)}} + L_{\text{dif}})^+ B_{\text{dif}} \mathbf{t}\|_\infty \\
&= \left\| \sum_{i=0}^{+\infty} (L_{\mathbf{t}, \bar{\mathbf{x}}^{(k)}}^+ L_{\text{dif}})^i L_{\mathbf{t}, \bar{\mathbf{x}}^{(k)}}^+ B_{\mathbf{t}, \bar{\mathbf{x}}^{(k)}} \mathbf{t} \right\|_\infty + \left\| \sum_{i=0}^{+\infty} (L_{\mathbf{t}, \bar{\mathbf{x}}^{(k)}}^+ L_{\text{dif}})^i L_{\mathbf{t}, \bar{\mathbf{x}}^{(k)}}^+ B_{\text{dif}} \mathbf{t} \right\|_\infty \\
&\leq \sum_{i=0}^{+\infty} \|L_{\mathbf{t}, \bar{\mathbf{x}}^{(k)}}^+ L_{\text{dif}}\|_{1, \infty}^i (\|L_{\mathbf{t}, \bar{\mathbf{x}}^{(k)}}^+ L_{\text{dif}}\|_{1, \infty}^i \|\bar{\mathbf{x}}^{(k+1)}\|_\infty + \|L_{\mathbf{t}, \bar{\mathbf{x}}^{(k)}}^+ B_{\text{dif}} \mathbf{t}\|_\infty) \\
&= \frac{\|L_{\mathbf{t}, \bar{\mathbf{x}}^{(k)}}^+ L_{\text{dif}}\|_{1, \infty} \|\bar{\mathbf{x}}^{(k+1)}\|_\infty + \|L_{\mathbf{t}, \bar{\mathbf{x}}^{(k)}}^+ B_{\text{dif}} \mathbf{t}\|_\infty}{1 - \|L_{\mathbf{t}, \bar{\mathbf{x}}^{(k)}}^+ L_{\text{dif}}\|_{1, \infty}} \\
&\leq \frac{\|L_{\mathbf{t}, \bar{\mathbf{x}}^{(k)}}^+\|_{1, \infty} d_{\text{max}}^{\text{dif}} (2\|\bar{\mathbf{x}}^{(k+1)}\|_\infty + \|\mathbf{t}\|_\infty)}{1 - 2d_{\text{max}}^{\text{dif}} \|L_{\mathbf{t}, \bar{\mathbf{x}}^{(k)}}^+\|_{1, \infty}}
\end{aligned}$$

Now we can complete the proof as

$$\|\mathbf{t}\|_\infty \leq \|\mathbf{x}^{(k)}\|_{d, \infty} + c^k \leq 2\|\mathbf{x}^{(k)} - \bar{\mathbf{x}}^{(k)}\|_\infty + c^k.$$

□

We proceed to control the two remaining quantities  $d_{\text{max}}^{\text{dif}}$  and  $\|L_{\mathbf{t}, \bar{\mathbf{x}}^{(k)}}^+\|_{1, \infty}$ . In both cases, we leverage the fact that  $\bar{\mathbf{x}}^{(k)}$  lies on the line between  $\mathbf{0}$  and  $\mathbf{1}$  so that we can utilize the independence of  $t_{ij}$ . We first provide an upper bound on  $d_{\text{max}}^{\text{dif}}$ .

**Lemma C.6** Suppose  $c^k = \Omega(\log^2(n)/n)$ . Denote  $d_{\text{max}}^{\mathbf{t}, \bar{\mathbf{x}}^{(k)}}$  as the maximum degree of graph truncated from  $\bar{\mathbf{x}}^{(k)}$ , then

$$\begin{aligned}
d_{\text{max}}^{\text{dif}} &\leq 4\|\mathbf{x}^{(k)} - \bar{\mathbf{x}}^{(k)}\|_\infty d_{\text{max}}^{\mathbf{t}, \bar{\mathbf{x}}^{(k)}} + \log(n) \sqrt{4\|\mathbf{x}^{(k)} - \bar{\mathbf{x}}^{(k)}\|_\infty d_{\text{max}}^{\mathbf{t}, \bar{\mathbf{x}}^{(k)}}} \\
&\leq 6\|\mathbf{x}^{(k)} - \bar{\mathbf{x}}^{(k)}\|_\infty (p + (1-p)c^k)n
\end{aligned} \tag{30}$$

almost surely.

*Proof:* Note that the different edges are incurred if each  $t_{ij}$  falls in the two intervals  $[(x_i^{(k)} - x_j^{(k)}) - c^k, (\bar{x}_i^{(k)} - \bar{x}_j^{(k)}) - c^k]$  and  $[(x_i^{(k)} - x_j^{(k)}) + c^k, (\bar{x}_i^{(k)} - \bar{x}_j^{(k)}) + c^k]$ . The total length of these two intervals is at most  $4\|\mathbf{x}^{(k)} - \bar{\mathbf{x}}^{(k)}\|_\infty$ . The first inequality directly follows from the Bernstein inequality. The second inequality follows from the fact that maximum vertex degree of a random sub-graph of edge selection probability  $p + (1-p)c^k$  is concentrated around  $(p + (1-p)c^k)n$ . □

The following lemma provides a concentration of  $\|L_{\mathbf{t}, \bar{\mathbf{x}}^{(k)}}^+\|_{1, \infty}$ .

**Lemma C.7** Consider random sub-graphs of clique  $K_n$  with edge selection probability  $q$ , we have

$$\|L_{\mathbf{w}}^+\|_{1, \infty} = \frac{1}{qn} \left( 2 + \frac{O(1)}{\sqrt{q}} \right). \tag{31}$$

with high probability.

**Proof:** First of all, for any matrix  $A \in \mathbb{R}^{n \times n}$ ,

$$\|A\|_{1, \infty} = \max_{1 \leq i \leq n} \sum_{j=1}^n |a_{ij}| \leq \max_{1 \leq i \leq n} \sqrt{n} \sqrt{\sum_{j=1}^n a_{ij}^2} \leq \sqrt{n} \sigma_{\text{max}}(A).$$



Since the non-zero eigenvalues of  $L^+$  fall in-between  $[\frac{1}{\lambda_n(L)}, \frac{1}{\lambda_2(L)}]$ , it follows that

$$\begin{aligned}\|L\|_{1,\infty} &\leq \|L^+ - \frac{1}{pn}(I_n - \frac{1}{n}\mathbf{1}_n\mathbf{1}_n^T)\|_{1,\infty} + \frac{2}{pn} \\ &\leq \frac{2}{pn} + \sqrt{n} \max(|\frac{1}{\lambda_2(L)} - \frac{1}{pn}|, |\frac{1}{\lambda_n(L)} - \frac{1}{pn}|).\end{aligned}$$

Since it is well known that the eigenvalues of the graph Laplacian of a Erdős-Rényi graph  $G(n, q)$  is concentrated within in the interval  $[qn - O(\sqrt{qn}), qn + O(\sqrt{qn})]$ , it follows that

$$\|L\|_{1,\infty} \leq \frac{2}{pn} + \frac{O(\sqrt{qn})\sqrt{n}}{p^2n^2}.$$

□

**Completing the proof of Theorem 3.2.** Now we are ready to prove Theorem 3.2. Denote  $\delta_k = \|\mathbf{x}^{(k)} - \bar{\mathbf{x}}^{(k)}\|_\infty$ . Combing (29), (30) and (31), we arrive at the following recursion:

$$\delta_{k+1} \leq \frac{15\delta_k(c^k + \delta_k)}{1 - 15\delta_k}. \quad (32)$$

As  $\delta_1 = O(\frac{\log(n)}{\sqrt{n}})$ . It follows that we can choose a small constant  $C_2$  so that

$$\delta_k < p/128, \quad 1 \leq k \leq \min(C_2\sqrt{\log(n)}, \log(\frac{a+b}{2\sigma})/\log(1/(1-p/2))).$$

and

$$\frac{1}{32} \leq e^{C_2\sqrt{\log(n)}} \leq \frac{1}{16}.$$

It then follows from (32) that

$$\delta_k \leq pc^k/4$$

for sufficiently large  $n$ .

It remains to check  $\|\mathbf{x}^{(k+1)}\|_\infty \leq \frac{1}{2}c^{k+1}$ . In fact, using (28) we have

$$\begin{aligned}\|\mathbf{x}^{(k+1)}\|_\infty &\leq \frac{(1-p)c^k}{2(p+(1-p)c^k)}c^k + c^k O(\log(n)/\sqrt{n}) + \frac{pc^k}{5} + \frac{p}{p+(1-p)c^k} \frac{pc^{k-1}}{5} \\ &\leq \frac{1}{2}(1-p/2)c^k \\ &\leq \frac{1}{2}c^{k+1},\end{aligned}$$

which ends the proof of Theorem 3.2.
